# Supplementary material for: Electronic transfusion consent and blood delivering pattern improve the management of blood bank in China
Source: Springer Nature journal article supplement (doi:10.1186/s12913-022-07825-6), 2022-04-26
Supplement: MOESM2 [file 20345762]

A

护理端 领血管理 领血单补打 血袋接收 输血流程 输血记录 血液流转查询

当前位置:领血管理 欢迎您: 打印机设定

1-14病区 患者列表

姓名/住院号: 查询

| 住院号 | 姓名 | 床位数 | 年龄 | 性别 |
|-----|----|-----|----|----|
| 1   |    | 2   | 50 | 女  |
| 2   |    | 2   | 50 | 女  |
| 3   |    | 2   | 50 | 女  |
| 4   |    | 5   | 55 | 男  |
| 5   |    | 6   | 64 | 女  |
| 6   |    | 8   | 67 | 男  |
| 7   |    | 10  | 51 | 男  |

领血单打印

患者姓名: 年龄: 性别:

住院号: 床位号: 诊断:

打印(领血) 未通知 通知配送 取消配送

| <input type="checkbox"/>            | 住院号 | 姓名 | 床位 | 产品号        | ABO血型 | RH血型 | 血液种类   | 数量    | 单位 | 是否配送 |
|-------------------------------------|-----|----|----|------------|-------|------|--------|-------|----|------|
| <input checked="" type="checkbox"/> |     |    |    | 6900770236 | B型    | 阳性   | 新鲜冰冻血浆 | 120.0 | ML |      |

Print the blood receipt

Notify delivery and cancel delivery

B

Need to delivery  
(Yes or No)

申请单管理 血库管理 实验室管理 血袋管理 自体血管理 查询管理 其他管理 报表管理 交接班管理 系统管理 基础数据管理 退出

当前位置:取血凭证打印 未打印 全部 输入患者姓名 输入住院号 输入申请单号 查询 打印 清单打印

|   | <input type="checkbox"/> | 住院号 | 姓名 | 病区 | 床号 | 产品号        | ABO血型 | Rh血型 | 血液种类      | 数量    | 单位 | 申请单号       | 是否配血 |
|---|--------------------------|-----|----|----|----|------------|-------|------|-----------|-------|----|------------|------|
| 1 | <input type="checkbox"/> |     |    |    | 3  | 3102425922 | B型    | 阳性   | 去白细胞悬浮红细胞 | 2.0   | U  | B010192929 | 是    |
| 2 | <input type="checkbox"/> |     |    |    | 5  | 3102434442 | A型    | 阳性   | 普通冰冻血浆    | 220.0 | ML | B010192918 |      |

C

--护理端 领血管理 领血单补打 血袋接收 输血流程 输血记录 血液流转查询

当前位置:血袋接收 欢迎您:

6-5病区

出库时间: 2022-02-27 - 2022-03-01 住院号: 姓名: 产品号: 查询

是否接收: 已接收 送血人: 请扫描(输入)工号并回车 接收人: 请扫描(输入)工号并回车 产品号: 请扫描血袋产品号 批量接收

|   | <input type="checkbox"/> | 手术间 | 出库号         | 住院号 | 姓名 | 产品号        | ABO | Rh | 血液类型   | 数量    | 单位 | 接收时间                | 接收人 | 送血人 |
|---|--------------------------|-----|-------------|-----|----|------------|-----|----|--------|-------|----|---------------------|-----|-----|
| 1 | <input type="checkbox"/> |     | 62202270022 |     |    | 6401134163 | O型  | 阳性 | 新鲜冰冻血浆 | 140.0 | ML | 2022-02-27 13:25:44 |     |     |
| 2 | <input type="checkbox"/> |     | 62202270023 |     |    | 6401094768 | O型  | 阳性 | 新鲜冰冻血浆 | 130.0 | ML | 2022-02-27 12:38:25 |     |     |
| 3 | <input type="checkbox"/> |     | 62202280046 |     |    | 3102408721 | A型  | 阳性 | 普通冰冻血浆 | 230.0 | ML | 2022-02-28 16:35:54 |     |     |
| 4 | <input type="checkbox"/> |     | 62202270026 |     |    | 6401092449 | O型  | 阳性 | 普通冰冻血浆 | 190.0 | ML | 2022-02-27 14:11:46 |     |     |

ID of full-time  
nurse who  
delivering blood

ID of the ward nurse  
who receiving the  
blood

Blood information
