# Supplementary material for: Electronic transfusion consent and blood delivering pattern improve the management of blood bank in China
Source: BMC Health Serv Res. 2022 Apr 26;22:561. doi: 10.1186/s12913-022-07825-6 (PMC9044836; doi:10.1186/s12913-022-07825-6)
Supplement: Supplementary file 3 — Additional file 3. Raw datasets of the consents. A Dataset of paper consents. B Dataset of electronic consents. C Total statistically proportion of paper and electronic consents per month (Excel file: sheets A, B and C). [file 12913_2022_7825_MOESM3_ESM.xls]

## Sheet: A
Dataset of paper consent in Department of Emergency
NO.	Month	Consent No.	Ward	Application time	Confirmation time
1	Jun	20190627007789	ED	2019-06-30 18:19:32	2019-06-30 18:30:32
2	Jun	20190628005558	ED	2019-06-30 10:56:01	2019-06-30 12:00:01
3	Jun	20190629004817	ED	2019-06-29 22:09:29	2019-06-29 22:33:29
4	Jun	20190629004673	ED	2019-06-29 18:43:42	2019-06-29 19:06:42
5	Jun	20190628006573	ED	2019-06-28 18:44:06	2019-06-28 19:33:06
6	Jun	20190628004570	ED	2019-06-28 13:50:31	2019-06-28 13:56:31
7	Jun	20190627005844	ED	2019-06-27 15:03:06	2019-06-27 15:48:06
8	Jun	20190627005898	ED	2019-06-27 15:19:18	2019-06-27 15:35:18
9	Jun	20190626005043	ED	2019-06-26 18:24:42	2019-06-26 20:01:42
10	Jun	20190625000091	ED	2019-06-25 07:26:49	2019-06-25 09:08:49
11	Jun	20190623003538	ED	2019-06-24 15:36:13	2019-06-24 16:02:13
12	Jun	20190623002565	ED	2019-06-23 13:18:36	2019-06-23 13:29:36
13	Jun	20190622001649	ED	2019-06-22 09:42:14	2019-06-22 09:58:14
14	Jun	20190621006167	ED	2019-06-21 20:40:54	2019-06-21 20:54:54
15	Jun	20190621006069	ED	2019-06-21 19:01:50	2019-06-21 19:05:50
16	Jun	20190620004966	ED	2019-06-20 12:42:48	2019-06-20 14:33:48
17	Jun	20190620000023	ED	2019-06-20 03:33:52	2019-06-20 03:40:52
18	Jun	20190619007190	ED	2019-06-20 00:41:23	2019-06-20 01:19:23
19	Jun	20190619004931	ED	2019-06-19 13:16:47	2019-06-19 14:41:47
20	Jun	20190618004418	ED	2019-06-18 14:18:47	2019-06-18 14:37:47
21	Jun	20190617008433	ED	2019-06-17 19:58:35	2019-06-17 21:40:35
22	Jun	20190617008427	ED	2019-06-17 19:35:10	2019-06-17 19:55:10
23	Jun	20190617006064	ED	2019-06-17 15:07:40	2019-06-17 15:32:40
24	Jun	20190617000794	ED	2019-06-17 11:14:04	2019-06-17 13:43:04
25	Jun	20190615002789	ED	2019-06-15 21:45:13	2019-06-15 22:11:13
26	Jun	20190614002615	ED	2019-06-14 10:01:37	2019-06-14 10:41:37
27	Jun	20190613004889	ED	2019-06-13 15:12:25	2019-06-13 15:25:25
28	Jun	20190613000042	ED	2019-06-13 05:19:06	2019-06-13 05:26:06
29	Jun	20190612000329	ED	2019-06-12 15:54:14	2019-06-12 16:04:14
30	Jun	20190611004244	ED	2019-06-11 10:35:20	2019-06-11 11:13:20
31	Jun	20190610008778	ED	2019-06-10 22:58:00	2019-06-10 23:18:00
32	Jun	20190610007745	ED	2019-06-10 21:17:53	2019-06-10 22:52:53
33	Jun	20190609000969	ED	2019-06-10 07:16:56	2019-06-10 07:24:56
34	Jun	20190609000044	ED	2019-06-09 04:26:37	2019-06-09 06:12:37
35	Jun	20190604006941	ED	2019-06-08 11:01:54	2019-06-08 13:43:54
36	Jun	20190608002615	ED	2019-06-08 12:57:54	2019-06-08 13:43:54
37	Jun	20190607003903	ED	2019-06-07 17:30:14	2019-06-07 17:41:14
38	Jun	20190607000585	ED	2019-06-07 10:16:08	2019-06-07 10:28:08
39	Jun	20190606001480	ED	2019-06-06 16:30:43	2019-06-06 16:45:43
40	Jun	20190606001896	ED	2019-06-06 10:37:09	2019-06-06 11:21:09
41	Jun	20190604008242	ED	2019-06-05 07:01:40	2019-06-05 07:08:40
42	Jun	20190604007511	ED	2019-06-04 23:31:49	2019-06-05 00:24:49
43	Jun	20190604003336	ED	2019-06-04 11:53:12	2019-06-04 12:06:12
44	Jun	20190602002513	ED	2019-06-02 12:24:00	2019-06-02 12:50:00
45	Jun	20190531006469	ED	2019-05-31 22:46:35	2019-06-01 07:29:35
46	Jul	20190731005027	ED	2019-07-31 12:30:17	2019-07-31 16:56:17
47	Jul	20190731006496	ED	2019-07-31 15:25:43	2019-07-31 15:33:43
48	Jul	20190730000058	ED	2019-07-30 05:05:10	2019-07-30 05:13:10
49	Jul	20190727004948	ED	2019-07-28 00:11:22	2019-07-28 00:35:22
50	Jul	20190727004869	ED	2019-07-27 22:37:44	2019-07-27 22:48:44
51	Jul	20190727004496	ED	2019-07-27 17:29:47	2019-07-27 17:42:47
52	Jul	20190727004363	ED	2019-07-27 16:26:46	2019-07-27 16:50:46
53	Jul	20190727003440	ED	2019-07-27 13:37:19	2019-07-27 15:08:19
54	Jul	20190726004839	ED	2019-07-26 14:34:15	2019-07-26 14:53:15
55	Jul	20190725006942	ED	2019-07-26 09:54:49	2019-07-26 10:13:49
56	Jul	20190725007181	ED	2019-07-25 23:16:30	2019-07-25 23:33:30
57	Jul	20190724007447	ED	2019-07-24 18:50:02	2019-07-24 19:33:02
58	Jul	20190724000066	ED	2019-07-24 06:27:37	2019-07-24 06:55:37
59	Jul	20190723006439	ED	2019-07-23 15:53:28	2019-07-23 16:29:28
60	Jul	20190723006224	ED	2019-07-23 14:57:58	2019-07-23 15:17:58
61	Jul	20190722008525	ED	2019-07-22 20:21:37	2019-07-22 21:03:37
62	Jul	20190721003709	ED	2019-07-21 18:32:35	2019-07-21 19:01:35
63	Jul	20190721003138	ED	2019-07-21 16:11:39	2019-07-21 16:28:39
64	Jul	20190720004999	ED	2019-07-20 23:39:54	2019-07-21 06:19:54
65	Jul	20190719006014	ED	2019-07-19 17:55:57	2019-07-19 18:17:57
66	Jul	20190719004683	ED	2019-07-19 14:18:18	2019-07-19 15:11:18
67	Jul	20190718000019	ED	2019-07-18 10:26:55	2019-07-18 10:50:55
68	Jul	20190717007894	ED	2019-07-18 00:22:04	2019-07-18 00:29:04
69	Jul	20190716008374	ED	2019-07-17 17:13:52	2019-07-17 17:28:52
70	Jul	20190717005218	ED	2019-07-17 12:46:00	2019-07-17 13:50:00
71	Jul	20190716005422	ED	2019-07-16 14:02:18	2019-07-16 14:08:18
72	Jul	20190716005129	ED	2019-07-16 13:50:44	2019-07-16 13:58:44
73	Jul	20190715000197	ED	2019-07-16 00:48:20	2019-07-16 01:00:20
74	Jul	20190715008800	ED	2019-07-15 18:22:18	2019-07-15 18:54:18
75	Jul	20190715000010	ED	2019-07-15 02:43:27	2019-07-15 02:59:27
76	Jul	20190714000583	ED	2019-07-14 11:56:15	2019-07-14 13:48:15
77	Jul	20190714002005	ED	2019-07-14 11:12:50	2019-07-14 12:43:50
78	Jul	20190709007265	ED	2019-07-13 10:22:23	2019-07-13 12:50:23
79	Jul	20190713000027	ED	2019-07-13 03:46:16	2019-07-13 03:54:16
80	Jul	20190713000031	ED	2019-07-13 03:13:11	2019-07-13 03:25:11
81	Jul	20190711007675	ED	2019-07-11 18:56:39	2019-07-11 20:05:39
82	Jul	20190710007892	ED	2019-07-10 19:13:56	2019-07-10 20:42:56
83	Jul	20190707002731	ED	2019-07-10 15:06:23	2019-07-10 15:15:23
84	Jul	20190710002118	ED	2019-07-10 10:38:51	2019-07-10 10:47:51
85	Jul	20190710002320	ED	2019-07-10 10:18:43	2019-07-10 10:32:43
86	Jul	20190709007603	ED	2019-07-10 00:19:11	2019-07-10 01:43:11
87	Jul	20190709007334	ED	2019-07-09 18:35:44	2019-07-09 19:58:44
88	Jul	20190709007414	ED	2019-07-09 17:58:38	2019-07-09 18:43:38
89	Jul	20190709000164	ED	2019-07-09 08:36:30	2019-07-09 10:07:30
90	Jul	20190706005206	ED	2019-07-07 00:23:12	2019-07-07 01:23:12
91	Jul	20190706003521	ED	2019-07-06 15:05:31	2019-07-06 15:15:31
92	Jul	20190704005297	ED	2019-07-05 12:10:04	2019-07-05 12:28:04
93	Jul	20190704007939	ED	2019-07-04 22:51:13	2019-07-04 23:24:13
94	Jul	20190703007315	ED	2019-07-04 11:40:19	2019-07-04 11:49:19
95	Jul	20190704001171	ED	2019-07-04 08:52:19	2019-07-04 09:30:19
96	Jul	20190703007947	ED	2019-07-04 00:38:14	2019-07-04 00:51:14
97	Jul	20190702008662	ED	2019-07-03 00:15:30	2019-07-03 00:21:30
98	Jul	20190702007330	ED	2019-07-02 17:23:08	2019-07-02 17:39:08
99	Jul	20190702002060	ED	2019-07-02 09:00:46	2019-07-02 09:41:46
100	Jul	20190630000015	ED	2019-07-01 16:19:35	2019-07-01 17:21:35
101	Jul	20190630003722	ED	2019-07-01 00:05:34	2019-07-01 01:15:34
102	Aug	20190831000021	ED	2019-08-31 09:20:13	2019-08-31 09:25:13
103	Aug	20190830006450	ED	2019-08-30 18:10:27	2019-08-30 18:19:27
104	Aug	20190827003303	ED	2019-08-27 11:22:52	2019-08-27 12:33:52
105	Aug	20190827000053	ED	2019-08-27 03:32:35	2019-08-27 03:58:35
106	Aug	20190826008332	ED	2019-08-26 21:45:55	2019-08-26 21:54:55
107	Aug	20190825003670	ED	2019-08-25 18:08:04	2019-08-25 18:15:04
108	Aug	20190825003178	ED	2019-08-25 14:41:27	2019-08-25 14:50:27
109	Aug	20190825000019	ED	2019-08-25 09:05:30	2019-08-25 07:10:30
110	Aug	20190824002466	ED	2019-08-24 12:46:59	2019-08-24 12:50:59
111	Aug	20190819007977	ED	2019-08-20 08:48:01	2019-08-20 09:00:01
112	Aug	20190819004574	ED	2019-08-19 11:25:16	2019-08-19 11:35:16
113	Aug	20190819003688	ED	2019-08-19 11:20:40	2019-08-19 11:24:40
114	Aug	20190818003794	ED	2019-08-18 18:09:39	2019-08-18 20:32:39
115	Aug	20190818003488	ED	2019-08-18 15:36:13	2019-08-18 15:42:13
116	Aug	20190818002748	ED	2019-08-18 12:16:25	2019-08-18 12:32:25
117	Aug	20190818000068	ED	2019-08-18 09:16:43	2019-08-18 09:33:43
118	Aug	20190817003408	ED	2019-08-17 12:38:06	2019-08-17 15:02:06
119	Aug	20190817003906	ED	2019-08-17 14:28:53	2019-08-17 14:44:53
120	Aug	20190817002823	ED	2019-08-17 10:32:32	2019-08-17 10:48:32
121	Aug	20190815005899	ED	2019-08-15 17:01:33	2019-08-15 19:05:33
122	Aug	20190814004274	ED	2019-08-14 11:42:06	2019-08-14 11:49:06
123	Aug	20190814001091	ED	2019-08-14 11:00:45	2019-08-14 11:12:45
124	Aug	20190813007820	ED	2019-08-14 09:01:43	2019-08-14 09:19:43
125	Aug	20190813007875	ED	2019-08-14 03:22:26	2019-08-14 03:50:26
126	Aug	20190813000036	ED	2019-08-13 03:47:27	2019-08-13 04:06:27
127	Aug	20190812000076	ED	2019-08-12 12:19:45	2019-08-12 13:21:45
128	Aug	20190811003839	ED	2019-08-11 20:10:53	2019-08-11 20:19:53
129	Aug	20190811003110	ED	2019-08-11 14:39:18	2019-08-11 14:54:18
130	Aug	20190810003124	ED	2019-08-10 22:04:55	2019-08-10 22:35:55
131	Aug	20190810002623	ED	2019-08-10 16:13:40	2019-08-10 17:39:40
132	Aug	20190810001674	ED	2019-08-10 12:43:25	2019-08-10 13:00:25
133	Aug	20190809005016	ED	2019-08-09 17:22:23	2019-08-09 17:55:23
134	Aug	20190809004388	ED	2019-08-09 12:45:40	2019-08-09 13:01:40
135	Aug	20190806008481	ED	2019-08-08 21:04:32	2019-08-08 22:01:32
136	Aug	20190808007333	ED	2019-08-08 19:50:38	2019-08-08 20:10:38
137	Aug	20190807002114	ED	2019-08-07 10:04:58	2019-08-07 11:26:58
138	Aug	20190806008721	ED	2019-08-06 21:22:42	2019-08-06 21:47:42
139	Aug	20190806000046	ED	2019-08-06 03:54:48	2019-08-06 06:31:48
140	Aug	20190804002770	ED	2019-08-04 19:28:07	2019-08-04 19:49:07
141	Aug	20190804000045	ED	2019-08-04 03:23:05	2019-08-04 03:35:05
142	Aug	20190803004901	ED	2019-08-03 18:35:29	2019-08-03 19:05:29
143	Aug	20190803004536	ED	2019-08-03 18:02:34	2019-08-03 18:28:34
144	Aug	20190803003480	ED	2019-08-03 14:53:43	2019-08-03 15:12:43
145	Aug	20190803002831	ED	2019-08-03 10:24:48	2019-08-03 10:47:48
146	Aug	20190802002381	ED	2019-08-02 12:06:26	2019-08-02 12:25:26
147	Aug	20190802002963	ED	2019-08-02 09:52:17	2019-08-02 10:17:17
148	Aug	20190801007385	ED	2019-08-01 17:49:37	2019-08-01 18:33:37
149	Aug	20190801004590	ED	2019-08-01 11:43:27	2019-08-01 13:46:27
150	Aug	20190801000057	ED	2019-08-01 05:16:42	2019-08-01 05:28:42
151	Sep	20190930008281	ED	2019-09-30 19:14:01	2019-09-30 21:12:01
152	Sep	20190926007682	ED	2019-09-26 18:37:35	2019-09-26 18:48:35
153	Sep	20190923000124	ED	2019-09-23 07:24:33	2019-09-23 07:48:33
154	Sep	20190920006891	ED	2019-09-21 00:02:19	2019-09-21 01:10:19
155	Sep	20190920000087	ED	2019-09-20 06:18:34	2019-09-20 06:29:34
156	Sep	20190920000042	ED	2019-09-20 02:53:56	2019-09-20 03:05:56
157	Sep	20190913002898	ED	2019-09-13 14:11:54	2019-09-13 14:26:54
158	Sep	20190911005097	ED	2019-09-11 13:01:12	2019-09-11 13:10:12
159	Sep	20190909005235	ED	2019-09-09 11:13:36	2019-09-09 11:35:36
160	Sep	20190907005197	ED	2019-09-08 02:14:29	2019-09-08 02:46:29
161	Oct	20191022007293	ED	2019-10-22 15:33:27	2019-10-22 15:43:27
162	Oct	20191022007053	ED	2019-10-22 15:15:34	2019-10-22 15:32:34
163	Oct	20191021000016	ED	2019-10-21 03:05:10	2019-10-21 06:28:10
164	Nov	20191102004588	ED	2019-11-02 21:19:03	2019-11-02 22:38:03
165	Dec	20191218000257	ED	2019-12-18 08:41:42	2019-12-18 09:00:42

## Sheet: B
Dataset of electronic consent in Department of Emergency
NO.	Month	Consent No.	Ward	Application time	Confirmation time
1	Aug	20190831004740	ED	2019-08-31 19:35:00	2019-08-31 19:43:12
2	Aug	20190827007831	ED	2019-08-28 00:24:10	2019-08-28 00:13:10
3	Aug	20190819008153	ED	2019-08-19 20:09:11	2019-08-19 20:12:11
4	Aug	20190822007236	ED	2019-08-22 20:06:39	2019-08-22 20:11:39
5	Aug	20190830004833	ED	2019-08-30 15:10:10	2019-08-30 14:35:10
6	Aug	20190815005899	ED	2019-08-15 17:01:00	2019-08-15 17:05:00
7	Sep	20190910002645	ED	2019-09-11 01:10:39	2019-09-11 01:25:39
8	Sep	20190909006668	ED	2019-09-09 16:48:29	2019-09-09 16:44:29
9	Sep	20190923007958	ED	2019-09-23 16:04:49	2019-09-23 16:06:49
10	Sep	20190901002182	ED	2019-09-01 12:41:02	2019-09-01 12:18:02
11	Sep	20190922003442	ED	2019-09-22 21:56:48	2019-09-22 21:59:48
12	Sep	20190915003402	ED	2019-09-16 09:56:15	2019-09-16 09:54:15
13	Sep	20190903000024	ED	2019-09-03 02:12:17	2019-09-03 02:28:17
14	Sep	20190911007286	ED	2019-09-11 21:53:05	2019-09-11 21:32:05
15	Sep	20190909005235	ED	2019-09-09 11:13:30	2019-09-09 11:16:30
16	Sep	20190910007787	ED	2019-09-10 21:08:28	2019-09-10 21:04:28
17	Sep	20190903006864	ED	2019-09-03 18:54:48	2019-09-03 18:56:48
18	Sep	20190928003608	ED	2019-09-28 13:33:25	2019-09-28 13:31:25
19	Sep	20190909008380	ED	2019-09-09 21:00:10	2019-09-09 21:08:10
20	Sep	20190925000297	ED	2019-09-26 13:28:14	2019-09-26 13:27:14
21	Sep	20190901001468	ED	2019-09-01 09:49:25	2019-09-01 09:45:25
22	Sep	20190924008143	ED	2019-09-24 18:23:53	2019-09-24 17:22:53
23	Sep	20190920006633	ED	2019-09-20 17:43:17	2019-09-20 17:45:17
24	Sep	20190913001894	ED	2019-09-13 11:07:46	2019-09-13 12:14:46
25	Sep	20190930008281	ED	2019-09-30 19:14:51	2019-09-30 19:22:51
26	Sep	20190928000011	ED	null	2019-09-28 00:46:31
27	Sep	20190914002776	ED	2019-09-14 13:50:12	2019-09-14 14:01:12
28	Sep	20190923005509	ED	2019-09-23 11:56:25	2019-09-23 12:00:25
29	Sep	20190902005391	ED	2019-09-02 16:44:37	2019-09-02 15:18:37
30	Sep	20190923003704	ED	2019-09-23 10:59:12	2019-09-23 09:52:12
31	Sep	20190928001279	ED	2019-09-28 10:16:15	2019-09-28 08:59:15
32	Oct	20191031006977	ED	2019-10-31 21:38:28	2019-10-31 21:39:28
33	Oct	20191031006156	ED	2019-10-31 18:00:22	2019-10-31 20:29:22
34	Oct	20191031003510	ED	2019-10-31 11:04:14	2019-10-31 11:02:14
35	Oct	20191029007329	ED	null	2019-10-29 17:07:06
36	Oct	20191028007935	ED	2019-10-28 20:25:56	2019-10-28 20:30:56
37	Oct	20191028005067	ED	2019-10-28 15:11:08	2019-10-28 15:13:08
38	Oct	20191027003714	ED	2019-10-27 20:21:51	2019-10-27 19:51:51
39	Oct	20191026003044	ED	2019-10-26 11:32:01	2019-10-26 11:35:01
40	Oct	20191023004776	ED	2019-10-23 11:24:09	2019-10-23 11:44:09
41	Oct	20191021008412	ED	2019-10-22 08:38:16	2019-10-22 00:05:16
42	Oct	20191021007489	ED	2019-10-21 16:42:08	2019-10-21 16:46:08
43	Oct	20191018000015	ED	2019-10-18 01:14:27	2019-10-18 01:33:27
44	Oct	20191017005852	ED	2019-10-17 14:41:10	2019-10-17 15:29:10
45	Oct	20191017004184	ED	2019-10-17 12:24:30	2019-10-17 12:28:30
46	Oct	20191015007887	ED	2019-10-15 23:26:11	2019-10-15 23:30:11
47	Oct	20191015007854	ED	2019-10-15 22:40:22	2019-10-15 22:46:22
48	Oct	20191014008583	ED	2019-10-14 22:49:32	2019-10-14 22:51:32
49	Oct	20191014008551	ED	2019-10-14 21:32:16	2019-10-14 19:52:16
50	Oct	20191012003541	ED	2019-10-12 18:16:26	2019-10-12 17:42:26
51	Oct	20191010007730	ED	2019-10-10 23:31:08	2019-10-10 23:28:08
52	Oct	20191009000035	ED	null	2019-10-09 13:02:30
53	Oct	20191004005031	ED	2019-10-04 12:49:50	2019-10-04 12:55:50
54	Oct	20191003002492	ED	2019-10-03 14:00:54	2019-10-03 14:08:54
55	Oct	20191003002346	ED	2019-10-03 15:09:11	2019-10-03 15:03:11
56	Oct	20191005003981	ED	null	2019-10-06 09:53:10
57	Oct	20191001000002	ED	2019-10-01 01:46:51	2019-10-01 00:51:51
58	Oct	20191001000745	ED	2019-10-01 17:26:22	2019-10-01 17:21:22
59	Oct	20191022000481	ED	2019-10-22 09:55:53	2019-10-22 09:59:53
60	Oct	20191028008100	ED	2019-10-28 20:18:11	2019-10-28 20:29:11
61	Oct	20191006003542	ED	2019-10-06 18:23:49	2019-10-06 18:06:49
62	Oct	20191026004922	ED	2019-10-26 21:33:34	2019-10-26 21:35:34
63	Oct	20191020003779	ED	2019-10-20 21:31:12	2019-10-20 21:34:12
64	Oct	20191007009266	ED	2019-10-07 22:14:21	2019-10-07 22:52:21
65	Oct	20191004007774	ED	2019-10-04 23:29:43	2019-10-04 23:39:43
66	Oct	20191019004103	ED	2019-10-19 15:49:22	2019-10-19 15:46:22
67	Oct	20191005002312	ED	2019-10-05 10:44:28	2019-10-05 10:40:28
68	Oct	20191003000611	ED	2019-10-03 09:55:12	2019-10-03 10:10:12
69	Oct	20191013003068	ED	2019-10-13 11:28:20	2019-10-13 11:31:20
70	Oct	20191010007719	ED	2019-10-10 19:24:36	2019-10-10 19:25:36
71	Oct	20191030004007	ED	2019-10-30 12:37:21	2019-10-30 11:04:21
72	Oct	20191019004890	ED	2019-10-20 09:33:54	2019-10-20 09:33:54
73	Oct	20191024007381	ED	2019-10-24 22:33:46	2019-10-24 22:34:46
74	Oct	20191017004885	ED	2019-10-17 23:22:13	2019-10-17 23:20:13
75	Oct	20191008007138	ED	2019-10-08 18:48:24	2019-10-08 18:52:24
76	Oct	20191029001509	ED	2019-10-29 14:41:08	2019-10-29 14:58:08
77	Oct	20191027001499	ED	2019-10-27 14:19:56	2019-10-27 14:45:56
78	Nov	20191126007311	ED	2019-11-27 10:49:26	2019-11-27 11:35:26
79	Nov	20191124003979	ED	2019-11-24 21:23:53	2019-11-24 21:22:53
80	Nov	20191124003615	ED	2019-11-24 16:02:37	2019-11-24 16:34:37
81	Nov	20191124002790	ED	2019-11-24 13:22:31	2019-11-24 13:40:31
82	Nov	20191123000024	ED	2019-11-23 02:45:51	2019-11-23 02:54:51
83	Nov	20191118007012	ED	2019-11-19 11:40:40	2019-11-19 11:43:40
84	Nov	20191118007012	ED	2019-11-18 16:24:21	2019-11-18 16:27:21
85	Nov	20191114006060	ED	2019-11-14 17:04:46	2019-11-14 15:59:46
86	Nov	20191112004892	ED	2019-11-12 12:50:44	2019-11-12 12:41:44
87	Nov	20191111006436	ED	2019-11-11 16:01:16	2019-11-11 16:01:16
88	Nov	20191110002500	ED	2019-11-10 11:45:16	2019-11-10 11:54:16
89	Nov	20191109003787	ED	2019-11-09 15:14:04	2019-11-09 15:16:04
90	Nov	20191102004358	ED	2019-11-02 17:29:49	2019-11-02 17:30:49
91	Nov	20191120004252	ED	2019-11-20 12:35:37	2019-11-20 12:06:37
92	Nov	20191101006552	ED	2019-11-01 21:07:08	2019-11-01 21:13:08
93	Nov	20191101004669	ED	2019-11-01 14:46:16	2019-11-01 13:54:16
94	Nov	20191102002964	ED	2019-11-02 12:41:13	2019-11-02 13:21:13
95	Nov	20191101005556	ED	2019-11-01 16:02:05	2019-11-01 16:08:05
96	Nov	20191118000583	ED	2019-11-18 09:52:15	2019-11-18 09:48:15
97	Nov	20191102004588	ED	2019-11-03 08:53:32	2019-11-03 08:55:32
98	Nov	20191101004029	ED	2019-11-01 13:58:16	2019-11-01 14:24:16
99	Nov	20191129003876	ED	2019-11-29 17:59:11	2019-11-29 18:00:11
100	Nov	20191105004875	ED	2019-11-05 11:32:06	2019-11-05 11:34:06
101	Nov	20191112007639	ED	2019-11-13 00:18:08	2019-11-12 23:48:08
102	Nov	20191104007966	ED	2019-11-04 16:48:36	2019-11-04 16:45:36
103	Nov	20191127006599	ED	2019-11-27 20:02:09	2019-11-27 19:19:09
104	Nov	20191120004663	ED	2019-11-20 12:45:22	2019-11-20 12:51:22
105	Nov	20191119005122	ED	2019-11-19 14:48:32	2019-11-19 14:51:32
106	Nov	20191121005375	ED	2019-11-21 15:51:02	2019-11-21 16:33:02
107	Nov	20191129006234	ED	2019-11-30 06:53:55	2019-11-30 06:54:55
108	Nov	20191107007079	ED	2019-11-08 01:37:05	2019-11-08 01:08:05
109	Nov	20191130004388	ED	null	2019-11-30 17:43:22
110	Nov	20191127005643	ED	2019-11-27 16:15:34	2019-11-27 14:52:34
111	Nov	20191125000187	ED	2019-11-25 07:19:25	2019-11-25 07:16:25
112	Nov	20191111007848	ED	2019-11-11 19:30:06	2019-11-11 19:28:06
113	Nov	20191119007486	ED	2019-11-19 20:32:33	2019-11-19 19:41:33
114	Nov	20191104008230	ED	2019-11-04 23:42:09	2019-11-04 21:09:09
115	Dec	20191231008223	ED	null	2019-12-31 21:47:00
116	Dec	20191230003764	ED	2019-12-30 09:45:55	2019-12-30 10:56:55
117	Dec	20191230002615	ED	2019-12-30 10:08:53	2019-12-30 10:28:53
118	Dec	20191229004603	ED	2019-12-30 00:15:53	2019-12-30 00:13:53
119	Dec	20191229004387	ED	2019-12-29 20:48:10	2019-12-29 20:29:10
120	Dec	20191227007135	ED	2019-12-28 01:33:49	2019-12-28 01:29:49
121	Dec	20191227006021	ED	2019-12-28 10:14:12	2019-12-28 10:11:12
122	Dec	20191226007859	ED	2019-12-26 22:11:55	2019-12-26 20:09:55
123	Dec	20191226004893	ED	2019-12-26 12:03:29	2019-12-26 12:17:29
124	Dec	20191222000649	ED	2019-12-22 09:54:46	2019-12-22 09:59:46
125	Dec	20191221004472	ED	2019-12-21 23:09:46	2019-12-21 23:07:46
126	Dec	20191220004644	ED	2019-12-20 13:30:59	2019-12-20 13:45:59
127	Dec	20191220004317	ED	2019-12-20 15:16:47	2019-12-20 15:16:47
128	Dec	20191220003504	ED	2019-12-20 11:17:43	2019-12-20 11:30:43
129	Dec	20191219004247	ED	2019-12-19 12:56:33	2019-12-19 13:03:33
130	Dec	20191216003491	ED	null	2019-12-16 10:41:54
131	Dec	20191213006488	ED	2019-12-13 23:31:09	2019-12-13 23:29:09
132	Dec	20191212005198	ED	2019-12-12 14:20:33	2019-12-12 14:23:33
133	Dec	20191210005059	ED	2019-12-10 13:09:09	2019-12-10 13:18:09
134	Dec	20191204006228	ED	2019-12-07 13:10:20	2019-12-07 13:04:20
135	Dec	20191204006228	ED	2019-12-04 16:25:34	2019-12-04 16:36:34
136	Dec	20191202008323	ED	2019-12-02 22:45:00	2019-12-02 23:55:00
137	Dec	20191202006228	ED	2019-12-02 15:25:09	2019-12-02 16:31:09
138	Dec	20191201003806	ED	2019-12-01 21:39:24	2019-12-01 21:41:24
139	Dec	20191216007439	ED	2019-12-16 20:10:41	2019-12-16 17:59:41
140	Dec	20191213004028	ED	2019-12-13 16:29:09	2019-12-13 15:35:09
141	Dec	20191202005293	ED	2019-12-02 13:20:20	2019-12-02 13:20:20
142	Dec	20191224006872	ED	2019-12-24 15:08:23	2019-12-24 15:28:23
143	Dec	20191203005778	ED	2019-12-03 15:11:59	2019-12-03 14:41:59
144	Dec	20191216006503	ED	2019-12-16 16:12:07	2019-12-16 16:26:07
145	Dec	20191224006517	ED	2019-12-24 14:43:37	2019-12-24 15:17:37
146	Dec	20191218004911	ED	2019-12-19 04:12:13	2019-12-19 04:09:13
147	Dec	20191202007082	ED	2019-12-02 16:42:48	2019-12-02 17:02:48
148	Dec	20191211004754	ED	2019-12-11 18:45:41	2019-12-11 19:12:41
149	Dec	20191211000007	ED	2019-12-11 01:00:04	2019-12-11 01:08:04
150	Dec	20191231004792	ED	2019-12-31 12:34:59	2019-12-31 11:27:59
151	Dec	20191211002088	ED	2019-12-11 14:06:26	2019-12-11 14:21:26
152	Dec	20191224007424	ED	2019-12-25 13:01:18	2019-12-24 18:05:18
153	Dec	20191220001794	ED	2019-12-20 10:39:48	2019-12-20 09:56:48
154	Dec	20191205006038	ED	2019-12-05 16:16:46	2019-12-05 16:13:46
155	Dec	20191201002444	ED	2019-12-01 16:24:59	2019-12-01 16:35:59
156	Dec	20191227005386	ED	2019-12-28 14:51:29	2019-12-28 14:50:29
157	Dec	20191223008043	ED	2019-12-23 15:37:46	2019-12-23 15:34:46
158	Dec	20191231002777	ED	2019-12-31 10:53:41	2019-12-31 09:42:41
159	Dec	20191214003778	ED	2019-12-14 16:02:39	2019-12-14 14:58:39

## Sheet: C
Total proportion of the consents
	Jun.	Jul.	Aug.	Sep.	Oct.	Nov.	Dec.
Ele%	0	0	0.1091	0.7143	0.9388	0.9737	0.9783
Pap%	1	1	0.8909	0.2857	0.0612	0.0263	0.0217
